# Supplementary material for: Investigating the Impact of Vitamin A and Amino Acids on Immune Responses in Celiac Disease Patients
Source: MDPI journal article supplement (doi:10.3390/diseases12010013), 2024-01-01
Supplement: s1 [file s1]

## Supplementary tables

**Table S1.** Sequence of primers used in real-time PCR

| <i>Gene Symbol</i>           | Forward primer               | Reverse primer               |
|------------------------------|------------------------------|------------------------------|
| <i>IL-2</i>                  | 5'-TACATGCCCAAGAAGGCCAC-3'   | 5'-AGCACTTCCTCCAGAGGTTTG-3'  |
| <i>IL-4</i>                  | 5'-CTTTGCTGCCTCCAAGAACAC-3'  | 5'-TTCCTGTCGAGCCGTTTCAG-3'   |
| <i>IL-10</i>                 | 5'- AAGAAGGCATGCACAGCTCA -3' | 5'- AAGTGGGTGCAGCTGTTCTC -3' |
| <i>IL-12</i>                 | 5'-GTGAGGTCTTAGGCTCTGGC-3'   | 5'-AACCTCGCCTCCTTTGTGAC-3'   |
| <i>TGF<math>\beta</math></i> | 5'-CAATTCCTGGCGATACCTCAG-3'  | 5'-GCACAACTCCGGTGACATCAA-3'  |
| <i>B2M</i>                   | 5'-CCAGCGTACTCCAAAGATTC-3'   | 5'-ATGTCGGATGGATGAAACCC-3'   |

Supplementary Figures

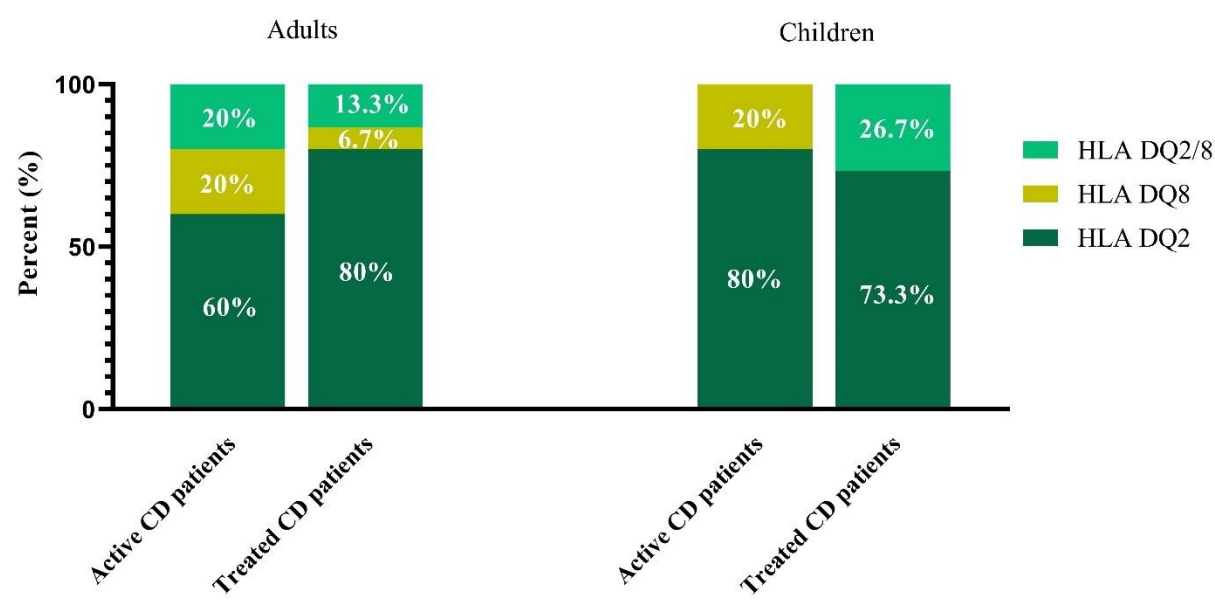

Figure S1. HLA status of studied patients

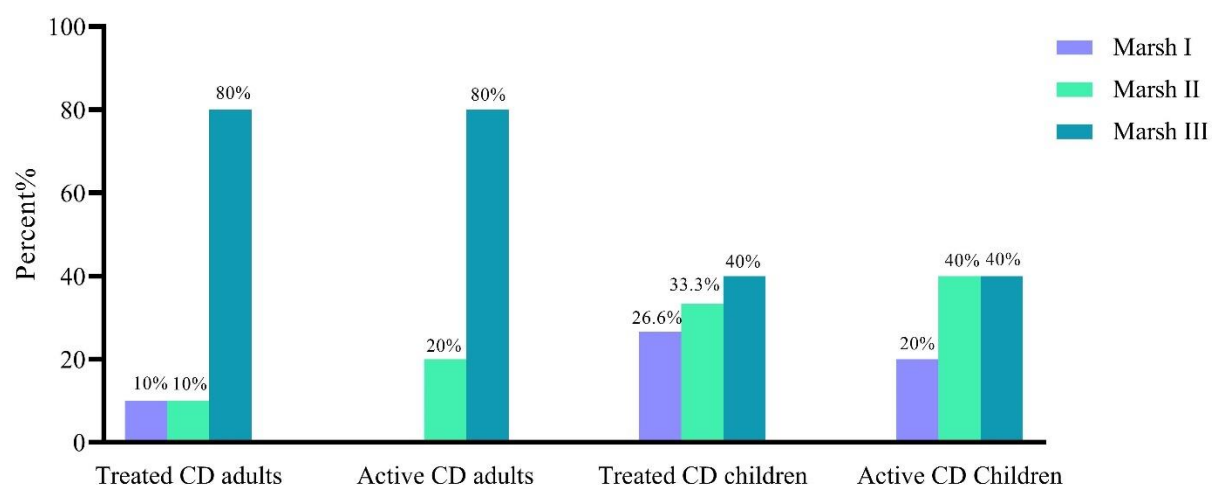

**Figure S2.** Histological classification of studied patients
